# Supplementary material for: Analytical method development for determining polycyclic aromatic hydrocarbons and organophosphate esters in indoor dust based on solid phase extraction and gas chromatography/mass spectrometry
Source: Royal Society of Chemistry journal article supplement (doi:10.1039/c5ay02789f), 2016-01-01
Supplement: c5ay02789f1.pdf [file c5ay02789f1.pdf]

## Supporting Information

Table S1 Targets of PAHs, abbreviations, molecular weight and quantitative ions

| Compounds name             | Abbreviations      | CAS number | Molecular weight | Quantitative ions |
|----------------------------|--------------------|------------|------------------|-------------------|
| Naphthalene                | NA                 | 91-20-3    | 128.17           | 128               |
| 2-Methylnaphthalene        | 2-MNA              | 91-57-6    | 142.20           | 142               |
| 1-Methylnaphthalene        | 1-MNA              | 90-12-0    | 142.20           | 142               |
| Biphenyl                   | BP                 | 92-52-4    | 154.21           | 154               |
| 2,6-Dimethylnaphthalene    | C <sub>2</sub> -NA | 581-42-0   | 156.22           | 156               |
| Acenaphthylene             | ACL                | 208-96-8   | 152.19           | 152               |
| Acenaphthene               | ACE                | 83-32-9    | 154.21           | 154               |
| 2,3,5-Trimethylnaphthalene | C <sub>3</sub> -NA | 2245-38-7  | 170.25           | 170               |
| Fluorene                   | FLU                | 86-73-7    | 166.22           | 166               |
| Dibenzothiophene           | DBT                | 132-65-0   | 184.26           | 184               |
| Phenanthrene               | PHE                | 85-01-8    | 178.23           | 178               |
| Anthracene                 | ANT                | 120-12-7   | 178.23           | 178               |
| 1-Methylphenanthrene       | 1-MPH              | 832-69-9   | 192.26           | 192               |
| Fluoranthene               | FLUO               | 206-44-0   | 202.25           | 202               |
| Pyrene                     | PYR                | 129-00-0   | 202.25           | 202               |
| Benzo(a)anthracene         | BaA                | 962-32-3   | 244.29           | 228               |
| Chrysene                   | CHR                | 218-01-9   | 228.29           | 228               |
| Benzo(b)fluoranthene       | BbF                | 205-82-3   | 252.31           | 252               |
| Benzo(k)fluoranthene       | BkF                | 207-08-9   | 252.31           | 252               |
| Benzo(e)pyrene             | BeP                | 192-97-2   | 252.31           | 252               |
| Benzo(a)pyrene             | BaP                | 50-32-8    | 252.31           | 252               |
| Perylene                   | PEY                | 198-55-0   | 252.31           | 252               |
| Indeno(1,2,3-cd)pyrene     | IcdP               | 193-39-5   | 276.33           | 276               |
| Dibenz(ah)anthracene       | DahA               | 53-70-3    | 278.35           | 278               |
| Benzo(ghi)perylene         | BghiP              | 191-24-2   | 276.33           | 276               |

Table S2 Representative targets of OPEs, abbreviations, molecular weight and quantitative ions

| <b>Compounds name</b>                | <b>Abbreviations</b> | <b>CAS number</b> | <b>Molecular weight</b> | <b>Quantitative ions</b> |
|--------------------------------------|----------------------|-------------------|-------------------------|--------------------------|
| Triethyl phosphate                   | TEP                  | 78-40-0           | 182.15                  | 99                       |
| Tri- <i>n</i> -propyl phosphate      | TnPP                 | 513-08-6          | 224.23                  | 99                       |
| Tri- <i>n</i> -butyl phosphate       | TnBP                 | 126-73-8          | 266.32                  | 99                       |
| Tri(2-chloroethyl) phosphate         | TCEP                 | 8060-81-9         | 285.49                  | 249                      |
| Tri(1,3-dichloroisopropyl) phosphate | TDCPP                | 13674-87-8        | 430.91                  | 381                      |
| Triphenyl phosphate                  | TPhP                 | 115-86-6          | 326.28                  | 326                      |
| Tri(2-butoxyethyl) phosphate         | TBEP                 | 78-51-3           | 398.47                  | 57                       |
| Tri(2-ethylhexyl) phosphate          | TEHP                 | 78-42-2           | 434.64                  | 99                       |
